# Supplementary material for: Effects of host species and environmental factors on the prevalence of Batrachochytrium dendrobatidis in northern Europe
Source: PLoS One. 2018 Oct 25;13(10):e0199852. doi: 10.1371/journal.pone.0199852 (PMC6201871; doi:10.1371/journal.pone.0199852)
Supplement: S1 Table — Bold information denotes data included in the local and landscape models. Light gray is the variables used in the local factor model and dark gray is the variables used in the three landscape models. (XLSX) [file pone.0199852.s001.xlsx]

## Sheet: Sheet1
Site data				Species data									Pond characteristics/Local factors			Forest landscape (ha)			Arable landscape (ha)			No. ponds landscape			No. people landscape			Sea landscape
Fig. 1 ID	Site name	latWGS85	lonWGS84	Bd	Bd+	Bd-	prev all	Species 2015	Species 2016	prev 2015	prev 2016	prev model	pH	Perimeter (m)	Canopy (%)	500m	2000m	5000m	500m	2000m	5000m	500m	2000m	5000m	500m	2000m	5000m	500m	2000m	5000m
1	Benarp	55.8588	13.7641	0	0	8	0	Ra, Rt		0		0	6.28	165	45	2.25	37.25	413.75	20.57	373.59	2645.18	0	5	38	3	213	1073	0	0	0
2	Brantevik	55.5093	14.3471	1	20	15	0.571429	Bv	Bb	0.909091		0.909091	7.88	110	5	0	0	0.25	1.33	316.5	2320.2	0	0	8	77	405	5957	1	1	1
3	Eskilstorp	55.479	12.9573	1	29	25	0.537037	Bv	Bb, Rt	0.966667		0.966667	7.93	176	5	0	0	0.75	19.34	555.45	3332.12	0	0	18	0	292	10405	1	1	1
4	Falsterbo	55.4052	12.8916	0	0	39	0	Bb, Ra, Rt		0		0	5.78	171	5	0	0	1.25	0	40.85	167.89	0	14	52	0	371	14538	1	1	1
5	Falsterbo strand	55.3951	12.822	1	24	73	0.247423	Bv	Ec, Bb, Rt	0.193548	0.857143	0.315789	7.6	817	5	0	0.5	0.5	0	0	117.68	5.00167	18	49	517	2319	7097	1	1	1
6	Högaborg	55.5391	14.0088	0	0	56	0	Bb, Rt					7.68	85	5	0	0	4.25	48.65	1046.99	6332.91	0	2	45	17	266	7467	0	0	0
7	Stensma	55.8477	13.9235	0	0	20	0		Bb, Rt				6.46	187	25	12.5	157	850.25	16.87	319.49	1602.2	2	9	36	15	70	807	0	0	0
8	Järavallen	55.8133	12.9485	1	7	17	0.291667	Ec	Bb	0.6		0.6	7.98	2023	5	0.71553	34.1064	72.9156	1.3	171.346	3102.41	0.596893	4.99988	60.5827	0	2336.37	9163.56	0	1	1
9	Klinhus	55.5468	13.7428	1	3	12	0.2	Bob		0.2		0.2	6.57	629	15	0.181614	11.9323	197.745	53.13	586.434	2928.7	2.17936	12.8501	83.0576	8	43.1398	391.143	0	0	0
10	Kungsmarken	55.7221	13.2847	0	0	32	0	Ra, Rt		0		0	6.84	73	5	0	16.5	33.25	42.56	854.74	5556.07	1	7	57	33	273	35127	0	0	0
11	Köpingebro	55.4482	13.948	0	0	31	0	Bb, Ra, Rt		0		0	7.03	240	5	0	1.44453	14.5277	70.96	706.039	4239.19	0	15.4083	51.2161	35	2313.18	3561.49	0	1	1
12	Limhamn	55.5676	12.932	0	0	13	0		Bv		0	0	7.82	227	5	0.212594	0.479355	70.5395	0	73.8783	1067.5	0.850375	11.5045	29.4939	1116	26519.9	135362	0	1	1
13	Lundåkra	55.858	12.8531	1	14	1	0.933333	Bv		0.933333		0.933333	7.7	170	55	0	10	28	0	28.17	1588.2	3	6	29	8	5315	35008	1	1	1
14	Mala	56.2179	13.7315	0	0	12	0		Bb				6.47	294	5	9.27178	174.52	531.56	15.91	169.375	1566.65	0	7.65018	93.2992	24	379.64	1355.29	0	0	0
15	Måryd	55.6998	13.3604	0	0	23	0		Ra		0	0	7.56	201	5	0	32	109.5	7.72	462.25	3918.2	6	20	72	0	2208	14700	0	0	0
16	Möllehässle	56.2709	12.505	1	7	7	0.5	Bob		0.5		0.5	7.27	191	5	0	37.75	140	26.01	205.72	1087.2	2	17	33	42	733	3192	1	1	1
17	Norra Hamnen	55.634	13.0054	1	21	1	0.954545		Bv		0.954545	0.954545	7.96	1536	5	0	3.91859	90.0308	0	0	164.872	1.03112	4.12483	32.3188	0	1168.98	121919	1	1	1
18	Tomarp	56.123	14.2284	0	0	24	0		Bb				6.8	587	5	5.74925	189.391	887.478	0.44	87.5718	2158.4	6.89911	12.1136	37.8994	0	153.749	1354.66	0	0	0
19	Ravlunda	55.745	14.1539	0	0	43	0	Bb, Ra, Rt		0		0	6.95	342	35	19.8006	377.397	721.822	0	15.2476	1429.53	0.816521	5.6894	19.5748	0	29.3953	1262.58	0	0	1
20	Revinge	55.7171	13.4335	1	17	60	0.220779	Ec, Rt	Bb, Ra	0.290323	0.333333	0.307692	8.13	421	45	0	0.702342	60.8613	0	169.527	3522.32	2.33892	17.7927	78.8763	0	160.134	5168.83	0	0	0
21	Riseberga S	56.0786	13.3275	1	1	18	0.0526316		Bb, Rt				7	593	55	9.24318	183.303	663.259	27.96	80.4885	622.214	0	6.41562	94.579	2	49.4919	633.1	0	0	0
22	Riseberga N	56.0887	13.3603	1	1	24	0.04	Bb					5.79	483	5	1.44875	74.6342	573.169	0	179.789	936.302	1.57331	23.4699	111.125	0	223.433	1226.27	0	0	0
23	Sjunnerup	55.969	13.5729	0	0	28	0	Ra, Rt		0		0	5.95	193	65	3.25	119	684.75	6.26	73.17	827.35	0	13	82	71	259	7857	0	0	0
24	Skansen	55.5505	14.3526	1	10	23	0.30303	Bb, Ra, Rt		0.5625		0.5625	6.62	87	15	0	0.5	1.25	0	206.29	2195.59	1	8	22	650	6195	7968	1	1	1
25	Skogshejdan	55.5506	13.8279	1	2	3	0.4	Ra, Rt		0.5		0.5	7.14	864	25	0.328662	50.8104	169.362	23.36	601.514	4737.98	0.657324	16.0454	84.9197	0	52.5932	668.862	0	0	0
26	Stensoffa	55.701	13.4487	0	0	25	0	Bb, Rt					7.11	1188	55	0	22.0089	87.0537	0	9.37319	2490.88	3.57449	19.8511	77.1719	0	50.0594	2230.46	0	0	0
27	Stockmöllan	55.9429	13.3954	0	0	32	0	Ra, Rt		0			5.27	73	65	2.25	39.75	371.25	7.64	351.06	2548.62	1	18	93	43	345	2322	0	0	0
28	Vressle	55.6697	13.6274	0	0	15	0	Ec		0		0	6.67	80	5	0	61.25	568	24.56	235.35	2006.43	3	11	47	18	147	1178	0	0	0
29	Västra Ingelstad	55.4869	13.1365	0	0	38	0	Bb, Ra, Rt		0		0	7.06	236	15	0	0	8.12879	64.45	1025.25	6781.32	5.20416	55.908	242.386	9	1511.44	3697.86	0	0	0
30	Åhus sandtag	55.929	14.2522	0	0	50	0	Bb, Ra, Rt		0		0	8.08	223	15	0	0.482766	139.023	10.12	552.757	3073.26	0	6.75872	24.6494	3	1481.13	10531.2	0	0	1
31	Ängelholm	56.2256	12.832	0	0	23	0		Bb, Rt			0	6.62	58	45	0.234633	42.5584	118.729	25.89	349.835	2905.46	0.724391	6.88807	44.7095	956	2501.35	22096.4	0	1	1
